# Sensory tuning does not match behavioral relevance of communication signals in free-living weakly electric fish

Jörg Henninger<sup>1</sup>, Rüdiger Krahe<sup>2,3</sup>, Frank Kirschbaum<sup>2</sup>, Jan Grewe<sup>1</sup>, Jan Benda<sup>1†</sup>

<sup>1</sup> Institut für Neurobiologie, Eberhard Karls Universität, Auf der Morgenstelle 28E, 72076 Tübingen, Germany

<sup>2</sup> Lebenswissenschaftliche Fakultät, Humboldt-Universität zu Berlin, Philippstr. 13, 10115 Berlin, Germany

<sup>3</sup> McGill University, Department of Biology, 1205 Ave. Docteur Penfield, Montreal, Quebec H3A 1B1, Canada

† corresponding author: [jan.benda@uni-tuebingen.de](mailto:jan.benda@uni-tuebingen.de)

## Abstract

Sensory systems evolve in the ecological niches each species is occupying. Accordingly, the tuning of sensory neurons is expected to match the statistics of natural stimuli. For an unbiased quantification of sensory scenes we tracked natural communication behavior of the weakly electric fish *Apteronotus rostratus* in their Neotropical rainforest habitat with high spatio-temporal resolution over several days. In the context of courtship and aggression we observed large quantities of electrocommunication signals. Echo responses and acknowledgment signals clearly demonstrated the behavioral relevance of these signals. Despite their relevance these signals are non-optimally represented in the sensory periphery. Frequencies of courtship signals are far outside of the neurons' best tuning range and signals occurring in assessment and attack behaviors drive sensory neurons just above threshold. Our results emphasize the importance of quantifying sensory scenes derived from freely behaving animals in their natural habitats for understanding the evolution and function of neural systems.

## 19 **Introduction**

20 Sensory systems evolve in the context of species-specific natural sensory scenes (Lewicki et al., 2014). Conse-  
21 quently, naturalistic stimuli have been crucial for advances in understanding the design and function of neural  
22 circuits in sensory systems, in particular the visual (Laughlin, 1981; Olshausen and Field, 1996; Betsch et al.,  
23 2004; Gollisch and Meister, 2010) and the auditory system (Theunissen et al., 2000; Smith and Lewicki, 2006;  
24 Clemens and Ronacher, 2013). Communication signals are natural stimuli that are, by definition, behaviorally  
25 relevant (Wilson, 1975). Not surprisingly, acoustic communication signals, for example, have been reported to  
26 evoke responses in peripheral auditory neurons that are highly informative about these stimuli (Rieke et al., 1995;  
27 Machens et al., 2005). However, other stimulus ensembles that do not optimally drive sensory neurons may also  
28 be behaviorally relevant and equally important for understanding the functioning of neural systems. Unfortunately,  
29 they are often neglected from an electrophysiological point of view, because they do not evoke obvious neural  
30 responses (Olshausen and Field, 2005).

31 To avoid this bias, we first describe behaviorally relevant sensory scenes in an animal's natural habitat and  
32 then compare the estimated resulting stimulus properties with known tuning characteristics of the respective sen-  
33 sory system. Tracking freely behaving and unrestrained animals in natural environments is notoriously challenging  
34 (Rodriguez-Munoz et al., 2010). We took advantage of the continuously generated electric organ discharge (EOD;  
35 Fig. 1 A) of gymnotiform weakly electric fish (Heiligenberg, 1991), to track their movements and electrocommu-  
36 nication signals without the need of tagging individual fish.

37 The quasi-sinusoidal EOD together with an array of electroreceptors distributed over the fish's skin (Carr et al.,  
38 1982) forms an active electrosensory system used for prey capture (Nelson and MacIver, 1999), navigation (Fo-  
39 towat et al., 2013), and communication (Smith, 2013). Both, the EOD alone and its modulations, function as  
40 communication signals that convey information about species, sex, status and intent of individuals (Hagedorn and  
41 Heiligenberg, 1985; Stamper et al., 2010; Fugère et al., 2011). In *Apteronotus* several types of brief EOD frequency  
42 excursions called "chirps" (Fig. 1 B) have been studied extensively in the laboratory (Engler and Zupanc, 2001; Za-  
43 kon et al., 2002) and have been associated with courtship (Hagedorn and Heiligenberg, 1985) and aggression (Hupé  
44 and Lewis, 2008). P-unit tuberous electroreceptors encode amplitude modulations of the EOD arising in commu-  
45 nication contexts (Bastian, 1981a). Their frequency tuning is crucial for the encoding of chirps (Benda et al., 2005;  
46 Walz et al., 2014).

47 We describe, for the first time, electrocommunication behavior of weakly-electric fish recorded in their nat-  
48 ural neotropical habitat with high temporal and spatial resolution. We found extensive chirping interactions on

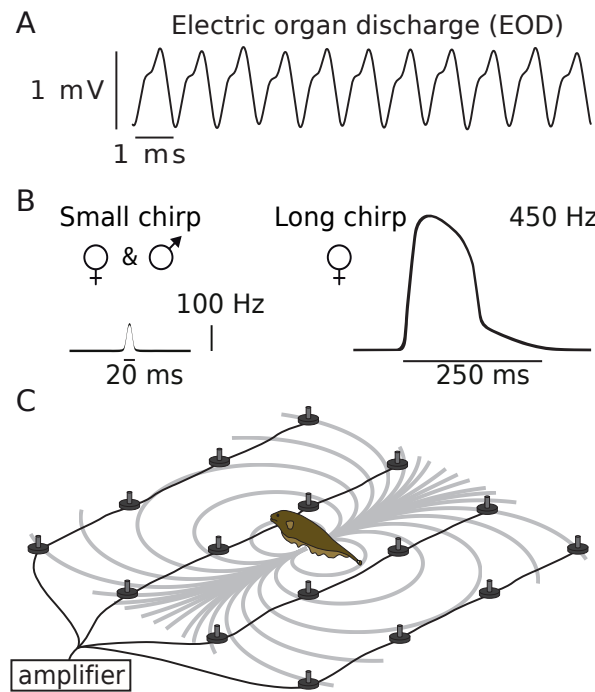

Figure 1: Monitoring electrocommunication behavior in the natural habitat. A) EOD waveform of *A. rostratus*. B) Transient increases of EOD frequency, called small and long chirps, function as communication signals. C) The EOD generates a dipolar electric field (gray isopotential lines) that we recorded with an electrode array, allowing to monitor fish interactions with high temporal and spatial acuity.

49 timescales ranging from tens of milliseconds to minutes in the context of courtship. In a complementary breeding  
50 experiment we confirmed the synchronizing role of chirping in spawning. Surprisingly, we found a strong mis-  
51 match between properties of courtship signals extracted from our outdoor recordings and the frequency tuning of  
52 the respective P-type electroreceptor afferents recorded in electrophysiological experiments. Our data demonstrate  
53 that receptor neurons do not have to be optimally tuned to relevant stimuli and that sensory systems are very well  
54 able to process non-optimal but relevant stimuli.

## 55 **Results**

56 We recorded the EODs of weakly electric fish in a stream in the Panamanian rainforest by means of a submerged  
57 electrode array at the onset of their reproductive season in May, 2012 (Fig. 1 C, Fig. S 1, movie S 4). Individual  
58 gymnotiform knifefish, *Apteronotus rostratus*, were identified and their movements tracked continuously based  
59 on the species- and individual-specific frequency of their EOD ( $EODf=600$  to  $1200$  Hz). In these recordings we  
60 detected several types of “chirps” emitted during courtship and aggression (Fig. 1 B). This approach allowed us

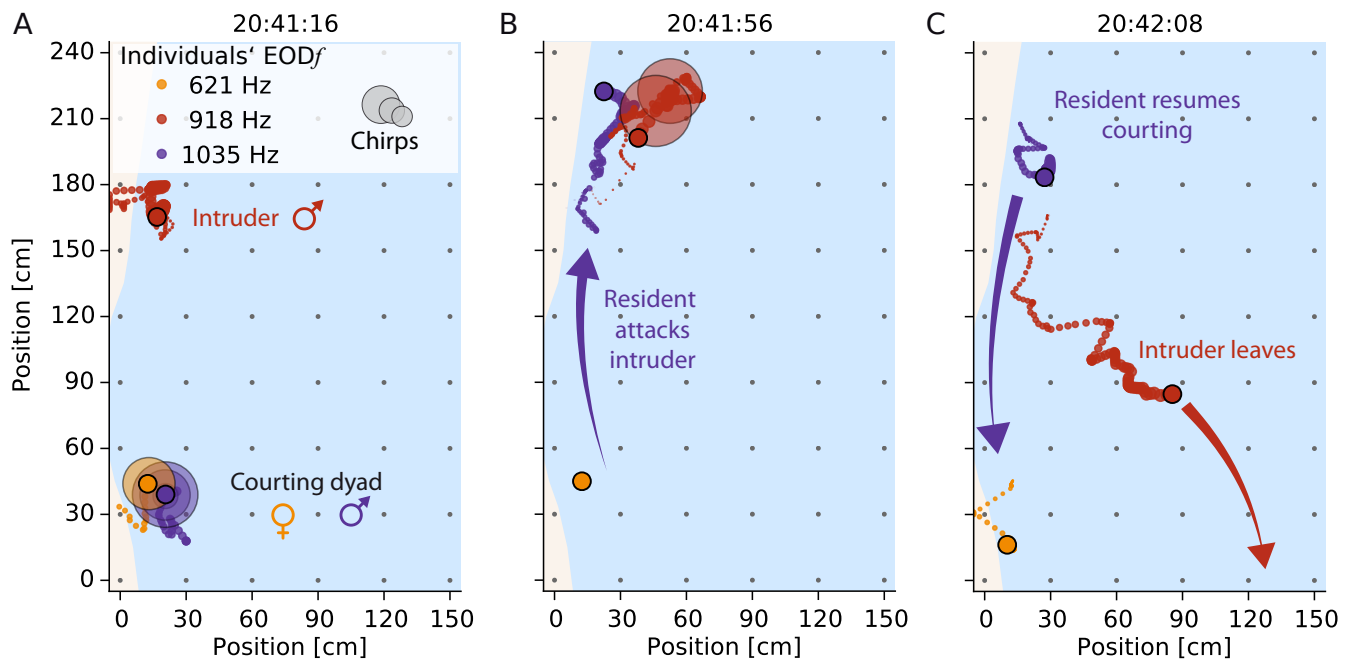

Figure 2: Snapshots of reconstructed fish interactions. See movie [S 5](#) for an animation. The current fish position is marked by filled circles. Trailing dots indicate the positions over the preceding 5 s. Colors label individual fish throughout the manuscript. Large transparent circles denote occurrence of chirps. Gray dots indicate electrode positions, and light blue illustrates the water surface. The direction of water flow is from top to bottom. A) Courting female (orange) and male (purple) are engaged in intense chirping activity. An intruder male (red) lingers at a distance of about one meter. B) The courting male attacks (purple arrow) the intruder who emits a series of chirps and, C) leaves the recording area (red arrow), while the resident male resumes courting (red arrow).

61 to reconstruct social interactions in detail (Fig. 2, movies [S 5](#) and [S 6](#)) and evaluate the associated sensory scenes  
 62 experienced by these fish in their natural habitat.

63 **Electrocommunication in the wild** We focused on two relevant communication situations, i.e., courtship and  
 64 aggressive dyadic interactions. In total, we detected 54 episodes of short-distance interactions that we interpreted as  
 65 courtship (see below) between low-frequency females ( $EODf < 750$  Hz,  $n=2$ ) and high-frequency males ( $EODf >$   
 66  $750$  Hz,  $n = 6$ ), occurring in 2 out of 5 nights. Courting was characterized by extensive production of chirps  
 67 (Fig. 2 A) by both males and females — with up to 8 400 chirps per individual per night. Most chirps were so-  
 68 called “small chirps”, characterized by short duration ( $< 20$  ms)  $EODf$  excursions of less than 150 Hz and minimal  
 69 reduction in EOD amplitude (Engler and Zupanc, 2001) (Fig. 1 B and Fig. 3). Only females emitted an additional  
 70 type of chirp in courtship episodes, the “long chirp” (Fig. 1 B and Fig. 3), with a duration of  $162 \pm 39$  ms ( $n = 54$ ), a

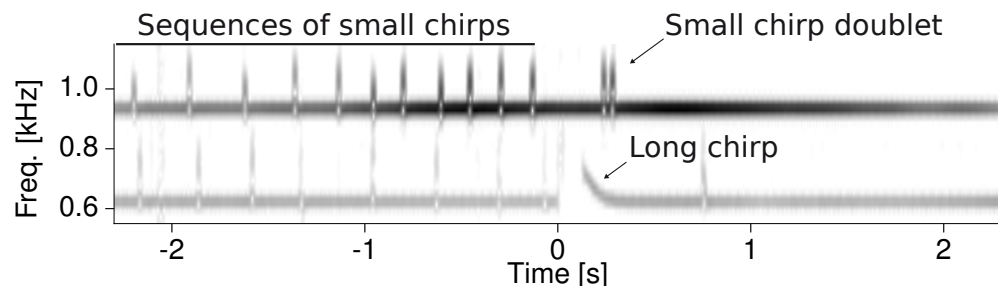

Figure 3: Spectrogram of stereotyped courtship chirping. The spectrogram (audio S3) shows EODs of a female (620 Hz, same as in Fig. 2) and a male (930 Hz) and their stereotyped chirping pattern during courtship: the two fish concurrently produce series of small chirps before the female generates a long chirp and the male responds with a chirp-doublet.

71 large EOD excursion of about 400 Hz, and a strong decrease in EOD amplitude. Per night and female we observed  
72 9 and 45 long chirps, respectively, generated every 3 to 9 minutes (1st and 3rd quartile), between 7 pm and 1 am  
73 (Fig. 4 A). Occasionally, courtship was interrupted by intruding males, leading to aggressive interactions between  
74 resident and intruder males (see below).

75 **Courtship chirping** Roaming males approached and extensively courted females by emitting large numbers of  
76 small chirps. Courtship communication was highly structured, with female long chirps playing a central role. Long  
77 chirps were preceded by persistent emission of small chirps by the male with rates of up to 3 Hz (Figs. 5 A, C).  
78 Immediately before the long chirp, the female small-chirp rate tripled from below 1 Hz to about 3 Hz within a  
79 few seconds. The male chirp rate followed this increase until the concurrent high-frequency chirping of both  
80 fish ceased after the female long chirp. These chirp episodes were characterized by close proximity of the two  
81 fish (< 30 cm, Figs. 5 B, D). Long chirps were consistently acknowledged by males with a doublet of small chirps  
82 emitted  $229 \pm 31$  ms after long chirp onset (Fig. 3). The two chirps of the doublet were separated by only  $46 \pm 6$  ms,  
83 more than seven-fold shorter than the most prevalent chirp intervals (Fig. S2). The concurrent increase in chirp  
84 rate and its termination by the female long chirp and male doublet stood out as a highly stereotyped communication  
85 motif that clearly indicates fast interactive communication (Fig. 3, audio S3).

86 **Males echo female chirps** On a sub-second timescale, male chirping was modulated by the timing of female  
87 chirps (Figs. 6 A, C). Following a female small chirp, male chirp probability first decreased to a minimum at about  
88 75 ms (significant in 4 out of 5 pairs of fish) and subsequently increased to a peak at about 165 ms (significant in 4  
89 out of 5 pairs of fish). In contrast to males, females did not show any echo response (Figs. 6 B, D) — they timed  
90 their chirps independently of the males' chirps.

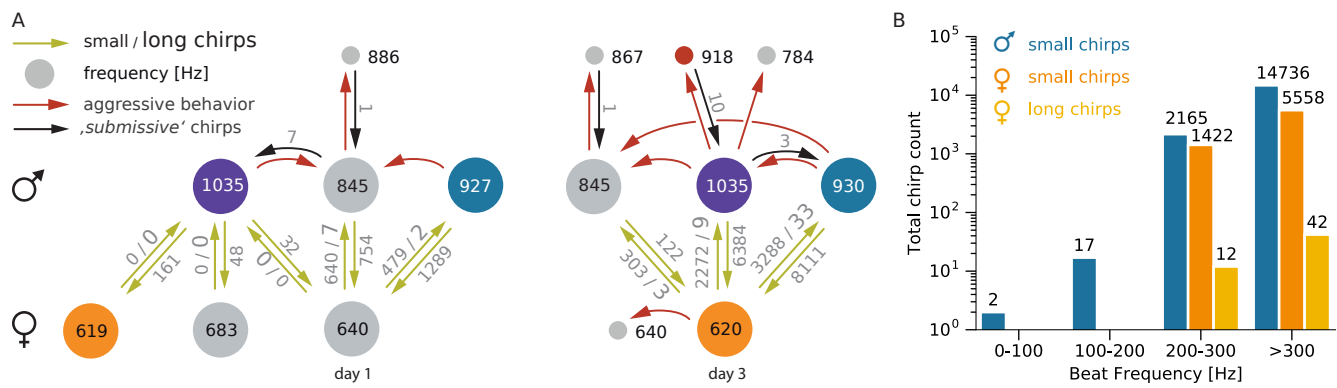

Figure 4: Social interactions and chirping. A) Ethogram of interacting *A. rostratus* individuals (colored circles) displaying their social relationships based on data from 2012-05-10 (night 1) and 2012-05-12 (night 3). The numbers within circles indicate the EOD $f$ s of each fish in Hertz. Fish with similar EOD $f$ s on day 1 and day 3 may have been the same individuals. Green arrows and associated numbers indicate the numbers of small chirps and long chirps emitted in close proximity (< 50 cm). Red arrows indicate aggressive behaviors, and black arrows the number of small chirps emitted during aggressive interactions. B) Histogram of chirp counts as a function of beat frequency (bin-width: 100 Hz). Note logarithmic scale used for chirp counts.

91 **Competition between males** A second common type of electro-communication interaction observed in our field  
 92 data was aggressive encounters between males competing for access to reproductively active females. These aggres-  
 93 sive interactions were triggered by intruding males that disrupted courtship of a resident, courting dyad. Resident  
 94 males detected and often attacked intruders over distances of up to 177 cm, showing a clear onset of directed move-  
 95 ment toward the intruder (Fig. 2 C, movie S 5). In 5 out of 12 such situations a few small chirps indistinguishable  
 96 from those produced during courtship were emitted exclusively by the retreating fish (Fig. 4 A). We observed a  
 97 single rise, a slow increase in EOD $f$  (Zakon et al., 2002), emitted by a retreating intruder fish.

98 **Synchronization of spawning** We investigated the role of the female long chirp in a breeding experiment in the  
 99 laboratory (Kirschbaum and Schugardt, 2002) by continuously recording and videotaping a group of 3 males and  
 100 3 females of the closely related species *A. leptorhynchus* (de Santana and Vari, 2013) over more than 5 months.  
 101 Scanning more than 1.3 million emitted chirps, we found 76 female long chirps embedded in communication  
 102 episodes closely similar to those observed in *A. rostratus* in the wild (compare Fig. 7 B with Fig. 3). Eggs were  
 103 only found after nights with long chirps (six nights). The number of eggs found corresponded roughly to the number  
 104 of observed long chirps, supporting previous anecdotal findings that *Apteronotus* females spawn single eggs during  
 105 courtship episodes (Hagedorn and Heiligenberg, 1985). The associated video sequences triggered on female long  
 106 chirps show that before spawning females swim on their side close to the substrate, e.g., a rock or a filter, while

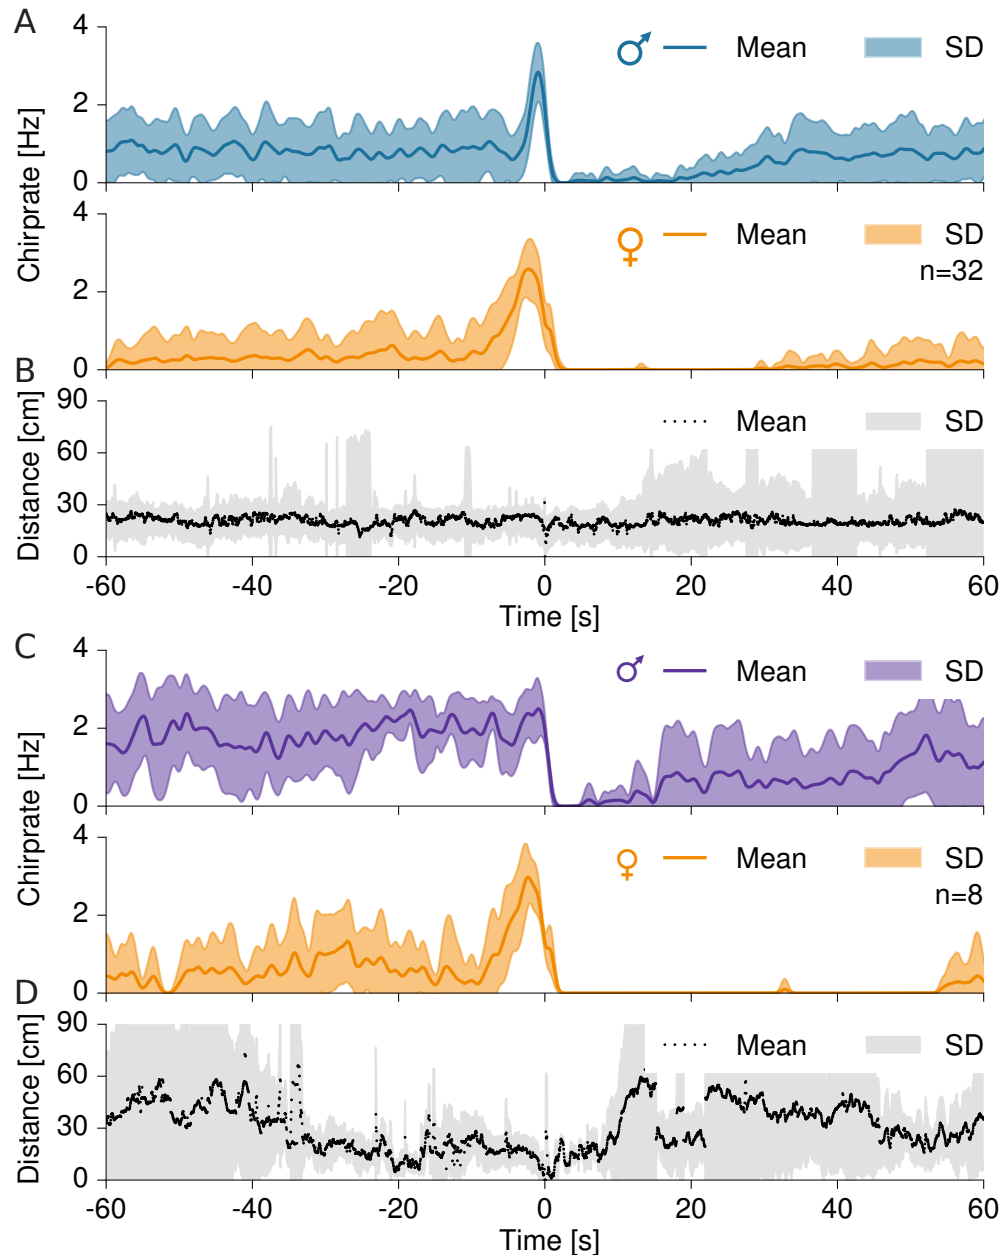

Figure 5: Temporal structure of courtship chirping of two example pairs. A) Average rate of small chirps of a male (top,  $EODf = 930$  Hz) courting a female (bottom,  $EODf = 620$  Hz, same pair as in Fig. 3, beat frequency is 310 Hz). B) Corresponding distance between the courting male and female. C, D) Same as in A and B for the pair shown in Fig. 2 (same female, male  $EODf = 1035$  Hz, beat frequency 415 Hz). Time zero marks the female long chirp. Bands mark SD.

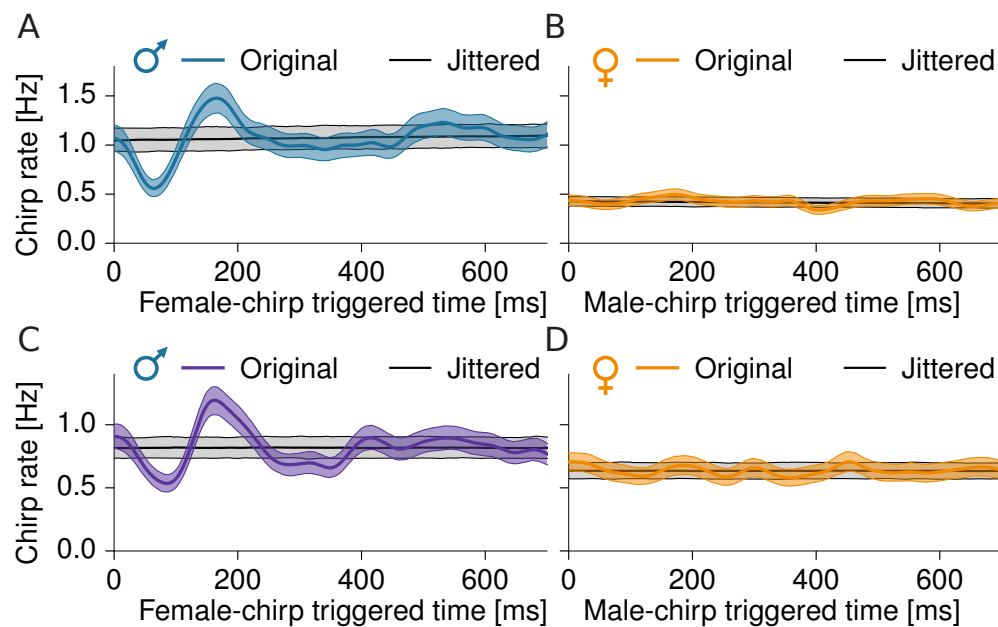

Figure 6: Fine structure of courtship chirping. Shown are cross-correlograms of chirp times, i.e. chirp rate of one fish relative to each chirp of the other fish (median with 95 % confidence interval in color), of the same courting pairs of fish as in Fig. 5. Corresponding chirp rates and confidence intervals from randomly jittered, independent chirp times are shown in gray. A, C) Male chirping is first significantly inhibited immediately after a female chirp (A: at 64 ms, Cohen’s  $d = 9.3$ , C: at 85 ms, Cohen’s  $d = 7.1$ ) and then transiently increased (A: at 166 ms,  $d = 5.9$ , C: at 162 ms,  $d = 7.5$ ). B, D) Female chirps are timed independently of male chirps (B: maximum  $d = 2.8$ , D: maximum  $d = 1.9$ ).

107 the male hovers in the vicinity of the female and emits chirps continuously (movie S7). In the last seconds before  
 108 spawning, the female starts to emit a series of chirps, whereupon the male approaches the female. A fraction  
 109 of a second before the female emits its long chirp, the male pushes the female and retreats almost immediately  
 110 afterwards (Fig. 7). It seems highly likely that this short episode depicts the synchronized release of egg and sperm.

111 **Mismatch between sensory tuning and courtship signals** In a final step, we deduce the statistics of natural  
 112 electrosensory stimuli resulting from the observed communication behaviors and relate it to the known physio-  
 113 logical properties of electrosensory neurons. Superposition of a fish’s EOD with that of a nearby fish results in a  
 114 periodic amplitude modulation, a so-called beat. Both frequency and amplitude of the beat provide a crucial signal  
 115 background for the neural encoding of communication signals (Marsat et al., 2012). The beat frequency is given  
 116 by the difference between the two EODs and the beat amplitude equals the EOD amplitude of the nearby fish  
 117 at the position of the receiving fish (Fotowat et al., 2013) (Fig. 8 A). The amplitude modulations are encoded by



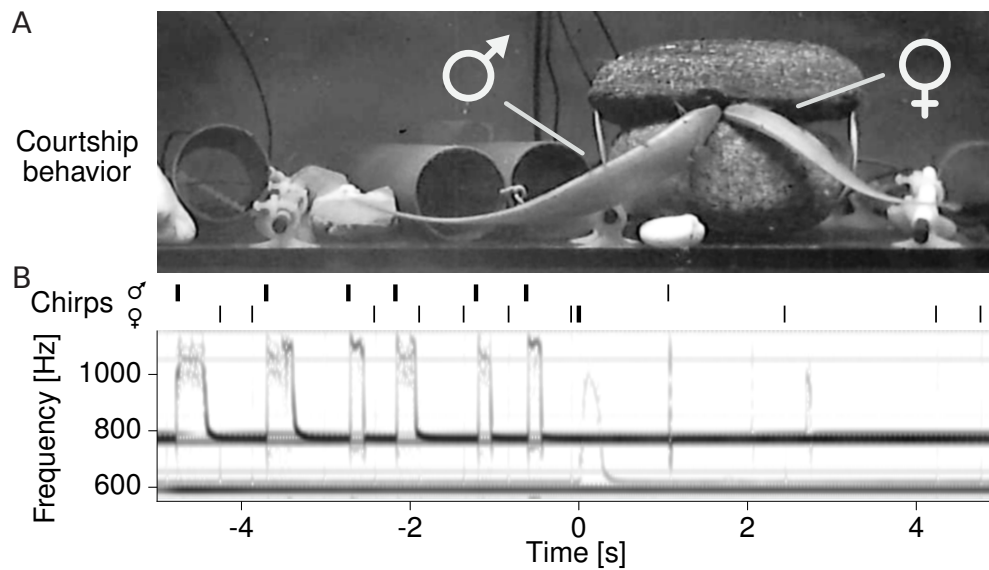

Figure 7: Synchronizing role of the female long chirp in spawning. A) Simultaneous video (snapshot of movie [S7](#)) and B) voltage recordings (spectrogram) of *A. leptorhynchus* in the laboratory demonstrate the synchronizing function of the female long chirp (at time zero; trace with  $EODf = 608$  Hz baseline frequency) in spawning. In contrast to *A. rostratus*, male *A. leptorhynchus* generate an additional, long chirp type before spawning (top trace with  $EODf = 768$  Hz baseline frequency). Chirp onset times of the male and the female are marked by vertical bars above the spectrogram. Thick and thin lines indicate long and short duration chirps, respectively.

118 tuberos electroreceptors (P-units) distributed over the fish's skin ([Bastian, 1981a](#); [Carr et al., 1982](#); [Nelson et al.,](#)  
119 [1997](#); [Benda et al., 2006](#); [Walz et al., 2014](#)).

120 We estimated the population activity of P-unit afferents in *A. leptorhynchus* from the standard deviation of the  
121 summed nerve activity, which is known to closely match the tuning properties of single nerve fibers ([Benda et al.,](#)  
122 [2006](#); [Walz et al., 2014](#)). The P-unit population response quickly dropped to low signal-to-noise ratios (Cohen's  
123  $d < 1$ ) at amplitudes corresponding to inter-fish distances larger than about 30 cm at 60 Hz beat frequency (Fig. [8 B](#)).  
124 P-unit afferents are also tuned to beat frequency and are most sensitive around 60 Hz ([Bastian, 1981a](#); [Walz et al.,](#)  
125 [2014](#)) (Fig. [8 E](#)), covering well the beat frequencies arising from same-sex interactions (Fig. [8 H](#)). Remarkably, all  
126 courtship chirping occurred at much higher beat frequencies (205–415 Hz, Fig. [8 G](#) and Fig. [4 B](#)). Even though the  
127 beat amplitudes during these interactions are large at the observed small distances of less than 32 cm (Fig. [8 C](#)),  
128 such high-frequency stimuli evoke only weak P-unit activity ( $d < 0.83$  at an amplitude corresponding to the closest  
129 measured distance for 260 Hz beat frequency). High beat frequencies are not a rare occurrence as the probab-  
130 ility distribution of 406 beat frequencies measured from encounters in 5 nights show (Fig. [8 F](#)), demonstrating a  
131 clear frequency mismatch between an important group of behaviorally relevant sensory signals and electroreceptor

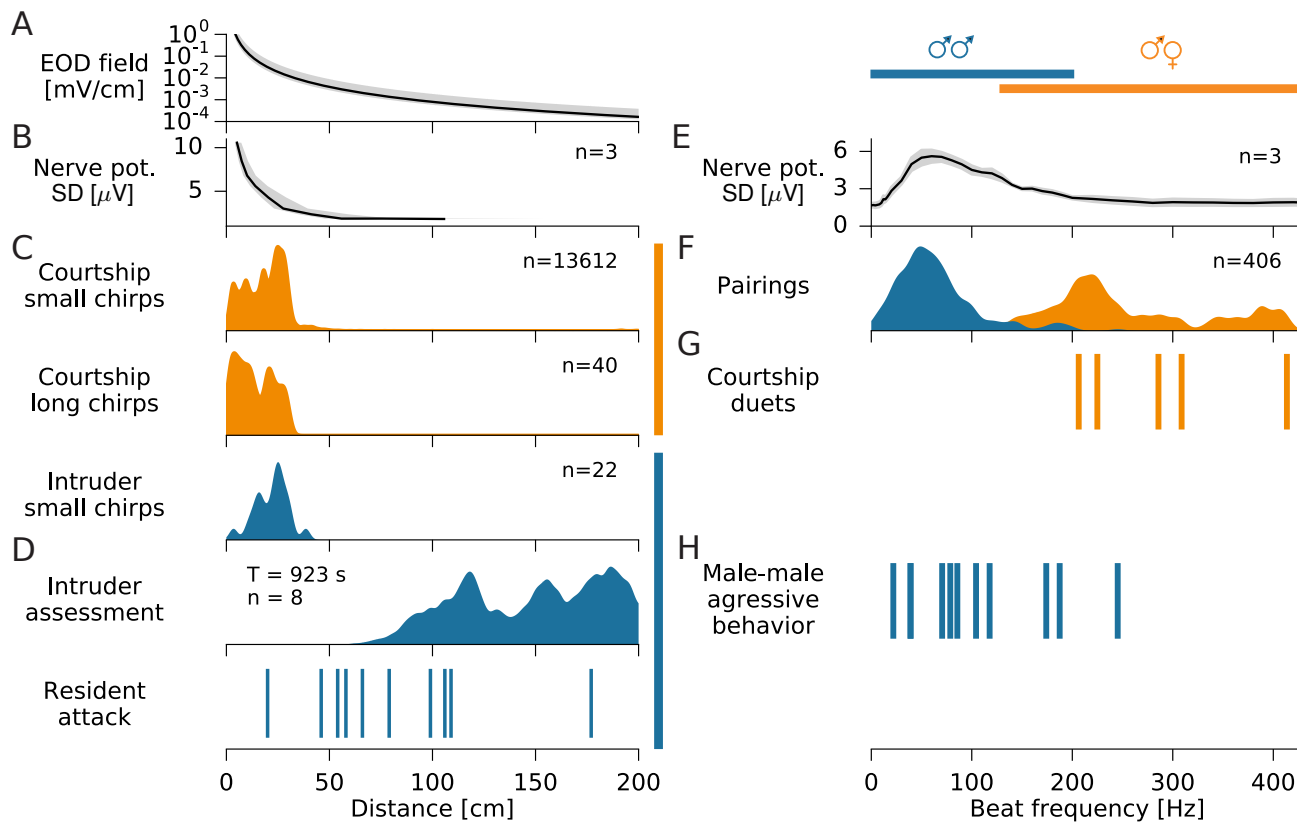

Figure 8: Non-optimal encoding of behaviorally relevant natural stimuli. A) Maximum electric field strength as a function of distance from the emitting fish (median with total range). B) Activity of the electroreceptor afferent population rapidly declines with distance between two fish (beat frequency 60 Hz). C) Small and long chirps in both courtship and aggression contexts are emitted consistently at distances below 32 cm. D) Intruder assessment and initiation of attacks by residents occur at much larger distances (movie S6). E) Tuning of electroreceptor afferent activity to beat frequency. F) Distribution of beat frequencies of all *A. rostratus* appearing simultaneously in the electrode array. blue: male-male, orange: male-female ( $n = 406$  pairings). G) Courtship behaviors occurred at beat frequencies in the range of 205–415 Hz, far from the receptors’ best frequency. H) Aggressive interactions between males occurred at beat frequencies below 245 Hz, better matching the tuning of the electroreceptor afferents.

132 tuning.

133 **Communication at long distances** In contrast, two behaviors involving intruding males occurred within the P-  
134 units' best-frequency range (Fig. 8H), but at large distances (Fig. 8D): (i) Intruding males initially often lingered  
135 at distances larger than 70 cm from the courting dyad (8 of 16 scenes, median duration 58.5 s; e.g., Fig. 2A,  
136 movie S5), consistent with assessment behavior (Arnott and Elwood, 2008). (ii) The distances at which resident  
137 males started to attack intruders ranged from 20 cm to 177 cm ( $81 \pm 44$  cm,  $n = 10$ , Fig. 2B, movie S6). At the  
138 largest observed attack distance of 177 cm, the electric field strength was estimated to be maximally  $0.34 \mu\text{V}/\text{cm}$   
139 (assuming the fish were oriented optimally) — a value close to minimum behavioral threshold values of about  
140  $0.1 \mu\text{V}/\text{cm}$  measured in the laboratory at the fish's best frequency (Knudsen, 1974; Bullock et al., 1972). Both  
141 situations, opponent assessment and decision to attack, therefore evoke weak activity of P-units close to the fish's  
142 perception threshold.

## 143 **Discussion**

144 We recorded movement and electrocommunication signals in a wild population of the weakly-electric fish, *Apterono-*  
145 *tus rostratus*, in their natural neotropical habitat by means of a submerged array of electrodes. A stereotyped pattern  
146 of interactive chirping climaxed in a special long chirp emitted by the female that we identified in a breeding ex-  
147 periment as a synchronizing signal for spawning. This electrocommunication behavior was characterized by echo  
148 responses by the male on a 100 ms time-scale and concurrent increases in chirp rate in dyads on a tens-of-seconds  
149 time-scale. The frequencies associated with courtship signals, however, were much higher than the optimal tuning  
150 range of electroreceptor afferents. As a consequence, courtship signals barely activate the electrosensory system.  
151 On the other hand, signals arising in some male-male aggressive interactions match the tuning of electroreceptors,  
152 but are nevertheless weak because of the large distance between the fish. These findings demonstrate that many  
153 important sensory signals are clearly not optimally encoded by peripheral electrosensory neurons. The observed  
154 behaviors indicate, however, that higher brain areas must be able to extract the relevant information reliably.

155 **Communication in the wild and in the laboratory** Animal communication is defined as the transfer of informa-  
156 tion by a signal generated by the sender that affects the behavior of the receiving animal (Wilson, 1975). Our obser-  
157 vations of male echo responses to female chirps occurring reliably within a few tens of milliseconds (Figs. 6A, C),  
158 precisely timed chirp doublets in response to female long chirps (Figs. 3), immediate behavioral reactions of males  
159 to female long chirps (Fig. 7, movie S7), and females slowly raising their chirp rate in response to male chirp-

ing (Fig. 5) clearly qualify chirps as communication signals in natural conditions. Laboratory studies have found slower echo responses on timescales of a few seconds exclusively between males (Hupé and Lewis, 2008; Zupanc et al., 2006; Salgado and Zupanc, 2011) and inhibiting effects of small chirps on attack behavior (Walz et al., 2013). Such a submissive function of male-to-male chirping is supported by our observations of a few chirps emitted by an intruder while being driven away by a dominant resident male. The number of chirps generated in these aggressive contexts is, however, much lower (1 to 10, median 3, chirps in 5 of 9 pairings, Fig. 4) compared to encounters staged in the laboratory (about 125 chirps per 5 min trial, Hupé and Lewis, 2008). Our field data do not support a function of chirps as signals of aggression and dominance (Triefenbach and Zakon, 2008). These differences may be due to the specific conditions under which the laboratory experiments were conducted.

In so-called “chirp chamber” experiments small chirps were predominantly generated by males at beat frequencies well below about 150 Hz, corresponding to same-sex interactions (Engler and Zupanc, 2001). On the contrary, in our observations on *A. rostratus* in the field and reproductive *A. leptorhynchus* in the laboratory, both male and female fish were almost exclusively chirping in male-female contexts at beat frequencies above about 200 Hz (Fig. 4 B). Also, the maximum small-chirp rates during courtship exceeded maximum rates reported from laboratory observations (Engler and Zupanc, 2001; Hupé and Lewis, 2008). Last but not least, the total number of chirps we recorded in two nights of courtship activity exceeded the so far published number of chirps recorded under artificial laboratory conditions by an order of magnitude (see Smith (2013) for a review). This large number of chirps allowed us to draw firm conclusions about the function of chirping.

**Duetting during courtship** Previous laboratory studies already suggested a function of the EOD and its modulations in courtship in *A. rostratus* (Hagedorn and Heiligenberg, 1985; Hagedorn, 1988) and in the synchronization of spawning and external fertilization in the pulse-type gymnotiform *Brachyhyopomus pinnicaudatus* (Silva et al., 2008). Our results provide strong evidence that female long chirps are an exclusive communication signal for the synchronization of egg spawning and sperm release: (i) The female long chirp was the central part of a highly stereotyped duet-like communication pattern between a male and female fish (Fig. 3 and Fig. 5). Multimodal signals synchronizing egg and sperm release have been observed in other aquatic animals (Lobel, 1992; Ladich, 2007). (ii) Fertilized eggs were found at the locations of male-female interaction, and only when the female had produced long chirps in the preceding night. (iii) The period immediately before the female long chirp was characterized by extensive chirp production by the male (Fig. 5), consistent with male courting behavior (Bradbury and Vehrencamp, 2011). (iv) Video sequences triggered on female long chirps clearly demonstrated the special role of the female long chirp (Fig. 7, movie S7). We hypothesize that the synchronization of external fertilization via

190 extensive electrocommunication gives females good control over who they reproduce with.

191 The males appear to compete for access to females. This and the observed serial consortship suggest a scramble  
192 competition mating system as it is common for animals living in a three-dimensional environment, e.g., fish and  
193 birds (Bradbury and Vehrencamp, 2011).

194 **Non-optimal encoding of behaviorally relevant signals** The distribution of beat frequencies (Fig. 8 F) and  
195 the obvious relevance of high frequencies for male-female communication is not reflected by the very low and  
196 flat tuning curve of the receptors in the high frequency range (Fig. 8 E, (Walz et al., 2014)), indicating a non-  
197 optimal neural representation of these signals. The profound mismatch between the tuning of receptor neurons  
198 and the high beat frequencies occurring during courtship is unexpected given the many examples of optimally  
199 encoded courtship signals in other sensory systems (Rieke et al., 1995; Machens et al., 2005; Kostarakos et al.,  
200 2009; Schrode and Bee, 2015). This mismatch is also unexpected from the perspective of the design of animal  
201 communication systems (Bradbury and Vehrencamp, 2011) and points to selective forces beyond the need for the  
202 male to provide strong stimulation to the female sensory system. In addition to the substantial metabolic cost  
203 of the active electrosensory system incurred by continuously generating an EOD (Salazar et al., 2013; Markham  
204 et al., 2016), this mismatch potentially also imposes a computational cost on the sensory system. The high beat-  
205 frequencies in male-female interactions are a consequence of a sexual dimorphism in EOD $f$  where males have  
206 higher frequencies (here  $907 \pm 77$  Hz,  $n = 10$ ) than females (here  $640 \pm 23$  Hz,  $n = 5$ ). In the genus *Apteronotus*  
207 the presence, magnitude, and direction of an EOD $f$  dimorphism varies considerably across species and thus is  
208 evolutionary labile (Smith, 2013). This points to very specific and subtle selection pressures generating EOD $f$   
209 dimorphisms that offset the reduced sensitivity for mates.

210 **Encoding of non-optimal high-frequency stimuli** Male echo responses to female chirps occurring reliably  
211 within a few tens of milliseconds (Figs. 6 A, C), precisely timed chirp doublets (Figs. 3), and long-range assessment  
212 and attacks (Fig. 8 D) demonstrate that the respective electrocommunication signals are successfully and robustly  
213 evaluated by the electrosensory system, despite the weak receptor activation that these interactions generate. A  
214 similar sensitivity of the electrosensory system has been shown in the context of prey detection where stimuli are  
215 low in frequency ( $< 25$  Hz) and small in amplitude (Nelson and MacIver, 1999).

216 How could the high-frequency courtship signals be encoded and processed by the electrosensory system? Gym-  
217 notiform weakly electric fish have three types of electroreceptor cells: (i) Ampullary receptors are tuned to low-  
218 frequency ( $< 50$  Hz) external electric fields and therefore do not encode the EOD with its EOD $f$  of more than  
219 about 600 Hz (Grewe et al., 2017) and chirps in *Apteronotus* that have no low-frequency component (Metzner and

220 Heiligenberg, 1991; Stöckl et al., 2014). (ii) In *Eigenmannia* T-unit tuberous receptors help to disambiguate the  
221 sign of the beat in the context of the jamming avoidance response (JAR) below about 15 Hz (Bullock et al., 1972;  
222 Rose and Heiligenberg, 1985). However, T-units are rare in *Apteronotus* (Maler et al., 1981; Heiligenberg and  
223 Dye, 1982). (iii) P-units, the second and dominant type of tuberous receptors (Carr et al., 1982), encode amplitude  
224 modulations of the fish's EOD in their firing rate (Scheich et al., 1973; Bastian, 1981a; Nelson et al., 1997; Benda  
225 et al., 2005; Walz et al., 2014). Thus, P-units are the only type of electroreceptors that are able to encode the wide  
226 range of amplitude modulations generated by beats and chirps in *Apteronotus*.

227 The tuning of P-units to beat frequencies has been characterized up to 300 Hz by single-unit recordings in both  
228 *A. albifrons* and *A. leptorhynchus* (Bastian, 1981a; Nelson et al., 1997; Benda et al., 2006; Walz et al., 2014). All  
229 studies agree that the average P-unit response is strongest at beat frequencies of about 30 to 130 Hz and declines  
230 almost back to baseline levels at 300 Hz in accordance with our measurements (Fig. 8E). However, P-units are  
231 heterogeneous in their baseline activity (Gussin et al., 2007; Savard et al., 2011; Grewe et al., 2017) and P-units  
232 with high baseline rates might show frequency tuning that extends to higher frequencies than the average tuning  
233 of the population (Knight, 1972). This is supported by noticeable stimulus-response coherences that have been  
234 measured with narrowband noise stimuli up to 400 Hz (Savard et al., 2011). Most of these studies used rather  
235 strong beat amplitudes of more than 10 % of the EOD amplitude. We observed chirp interactions at distances up  
236 to 32 cm, corresponding to beat amplitudes from 100 % down to about 1 % of the EOD amplitude. Smaller beat  
237 amplitudes result in down-scaled frequency tuning curves (Bastian, 1981a; Benda et al., 2006). In particular, for  
238 amplitudes below 10 %, responses to beat frequencies larger than 200 Hz are close to baseline activity (Benda et al.,  
239 2006).

240 Chirp encoding can be understood based on the frequency tuning of P-units (Walz et al., 2014). A chirp  
241 transiently increases the beat frequency. The response to the chirp differs only as much from the response to the  
242 background beat as the frequency response to the chirp differs from the one to the beat. Therefore, we expect chirp  
243 coding to be additionally impaired by the low slope of the P-unit's frequency tuning curve at high beat frequencies.

244 **Decoding** The robust behavioral responses suggest that the weak, non-optimal activation of electroreceptor neu-  
245 rons is compensated for at later processing stages. The compensating mechanisms likely involve synchrony de-  
246 tection (Middleton et al., 2009; Grewe et al., 2017), averaging (Maler, 2009b; Jung et al., 2016), and feedback  
247 connections from higher brain areas, including the telencephalon (Giassi et al., 2012; Krahe and Maler, 2014),  
248 that modulate the first stage of electrosensory processing in the hindbrain (Bastian, 1986). P-units converge onto  
249 pyramidal cells in the electrosensory lateral line lobe (ELL) (Heiligenberg and Dye, 1982; Bastian, 1981b; Maler,

250 2009a). The pyramidal cells processing communication signals (Metzner and Juranek, 1997; Krahe et al., 2008;  
251 Vonderschen and Chacron, 2011; Marsat et al., 2012) integrate over 1000 P-units each (Maler, 2009a), their tuning  
252 curves peak at frequencies similar to or lower than those of P-units (Bastian, 1981b), and their stimulus-response  
253 coherences peak well below 100 Hz, but have only been measured up to 120 Hz (Chacron et al., 2003; Chacron,  
254 2006; Krahe et al., 2008). Coding of small chirps by pyramidal cells in the ELL has so far only been studied at  
255 beat frequencies below 60 Hz (Vonderschen and Chacron, 2011; Marsat et al., 2012). Thus, most electrophysio-  
256 logical recordings from the electrosensory system have been biased to low beat frequencies and strong stimulus  
257 amplitudes evoking obvious neuronal responses, but ignoring the behaviorally most relevant stimuli (Olshausen  
258 and Field, 2005).

259 **Hormonal influences** Depending on the state of the animal, electrosensory tuning may be modified, e.g., by  
260 hormones and/or neuromodulators. Steroids are known to modulate EOD $f$  and tuning of P-units to EOD $f$  (Meyer  
261 and Zakon, 1982; Meyer et al., 1987; Dunlap et al., 1998). Serotonin is a neuromodulator that is released in the  
262 ELL in response to communication signals (Fotowat et al., 2016) and potentially enhances activity levels in ELL  
263 (Deemyad et al., 2013). Activation of muscarinic receptors by acetylcholine has been shown to improve low-  
264 frequency coding of pyramidal cells (Ellis et al., 2007). Whether and how hormones or neuromodulators influence  
265 coding of high-frequency beats is not known yet.

266 **Conclusion** Our observations regarding sex-specificity, numbers, and functions of chirps differ substantially from  
267 laboratory studies. Limited space and artificial settings may have biased interactions towards aggressive behaviors.  
268 In the wild, these aggressive encounters were rare and were accompanied by only little or no chirping. In contrast,  
269 courtship scenes stood out as highly structured and long-lasting sequences of high-frequency chirping. We have  
270 shown that similar courtship behavior can be reproduced in the laboratory by giving the fish enough time to interact  
271 — several month instead of minutes or hours.

272 The fish robustly responded to courtship signals although courtship signals activate P-unit electroreceptors only  
273 weakly at the tail of their tuning curve. The extent of this mismatch in frequency tuning was unexpected given previ-  
274 ous, mainly laboratory-based findings (Walz et al., 2013). For the first time we observed long-distance interactions  
275 between competing males that also emphasize the ability of the electrosensory system to process relevant signals  
276 close to threshold reliably. Our field data thus identify important — but so far neglected — stimulus regimes of  
277 the electrosensory system and provide further evidence for the existence of sensitive neural mechanisms for the  
278 detection of such difficult sensory signals (Gao and Ganguli, 2015).

279 The analysis of field data from the natural environments a specific species evolved in could point to behav-

iorally relevant sensory scenes that are otherwise neglected because they do not obviously excite sensory neurons (Olshausen and Field, 2005). Here, this is exemplified for weakly-electric fish. For other organisms and sensory systems field data may as well reveal unexpected sensory scenes. Such difficult and complex signals that nevertheless are behaviorally relevant open new windows for investigating the real challenges faced and solved by sensory systems.

## Materials and methods

### Field site

The field site is located in the Tuirá River basin, Province of Darín, Republic of Panamá (fig. S1 A), at Quebrada La Hoya, a narrow and slow-flowing creek supplying the Chucunaque River. Data were recorded about 2 km from the Ember community of Pea Bijagual and about 5 km upstream of the stream's mouth ( $8^{\circ}15'13.50''\text{N}$ ,  $77^{\circ}42'49.40''\text{W}$ ). The water of the creek is clear, but becomes turbid for several hours after heavy rainfall. The creek flows through a moist secondary tropical lowland forest, which, according to local residents, gets partially flooded on a regular basis during the wet season (May – November). The water levels of the creek typically range from 20 – 130 cm at different locations, but can rise temporarily to over 200 cm after heavy rainfall. At our recording site (fig. S1 B), the water level ranged from 20 – 70 cm. The banks of the creek are typically steep and excavated, consisting mostly of root masses of large trees. The water temperature varied between 25 and 27 °C on a daily basis and water conductivity was stable at 150 – 160  $\mu\text{S}/\text{cm}$ . At this field site we recorded four species of weakly electric fish, the pulse-type fish *Brachyhypopomus occidentalis* (~ 30 – 100 Hz pulses per second), the wave-type species *Sternopygus dariensis* (EOD  $f$  at ~ 40 – 220 Hz), *Eigenmannia humboldtii* (~ 200 – 600 Hz), and *Apteronotus rostratus* (~ 600 – 1100 Hz). We here focused exclusively on *A. rostratus*, a member of the *A. leptorhynchus* species group (brown ghost knifefish (de Santana and Vari, 2013)) and its intraspecies interactions.

### Field monitoring system

Our recording system (Fig. 1 C, fig. S1 B) consisted of a custom-built 64-channel electrode and amplifier system (npi electronics GmbH, Tamm, Germany) running on 12 V car batteries. Electrodes were low-noise headstages encased in epoxy resin ( $1 \times$  gain,  $10 \times 5 \times 5$  mm). Signals detected by the headstages were fed into the main amplifier ( $100 \times$  gain, 1st order high-pass filter 100 Hz, low-pass 10 kHz) and digitized with 20 kHz per channel with 16-bit amplitude resolution using a custom-built low-power-consumption computer with two digital-analog converter cards (PCI-6259, National Instruments, Austin, Texas, USA). Recordings were controlled with custom



software written in C++ (<https://github.com/bendalab/fishgrid>) that also saved data to hard disk for offline analysis (exceeding 400 GB of uncompressed data per day). Raw signals and power spectra were monitored online to ensure the quality of the recordings. We used a minimum of 54 electrodes, arranged in an  $9 \times 6$  array covering an area of  $240 \times 150$  cm (30 cm spacing). The electrodes were mounted on a rigid frame (thermoplast  $4 \times 4$  cm profiles, 60 % polyamid, 40% fiberglass; Technoform Kunststoffprofile GmbH, Lohfelden, Germany), which was submerged into the stream and fixed in height 30 cm below the water level. Care was taken to position part of the electrode array below the undercut banks of the stream in order to capture the EODs of fish hiding in the root masses. The recording area covered about half of the width of the stream and the hiding places of several electric fish. The maximum uninterrupted recording time was limited to 14 hours, determined by the capacity of the car batteries ( $2 \times 70$  Ah) and the power consumption of the computer (22 W) and amplifier system (25 W).

### 318 **Data analysis**

All data analysis was performed in Python 2.7 ([www.python.org](http://www.python.org), <https://www.scipy.org/>). Scripts and raw data (Panama field data: 2.0 TB, Berlin breeding experiment: 3.7 TB of EOD recordings and 11.4 TB video files) are available on request, some of the core algorithms are accessible at <https://github.com/bendalab/thunderfish>. Summary data are expressed as means  $\pm$  standard deviation, unless indicated otherwise.

**323 Spectrograms** Spectrograms in Fig. 3 and Fig. 7 B were calculated from data sampled at 20 kHz in windows of 1024 and 2048 data points, corresponding to 51.2 ms and 102.4 ms, respectively, applying a Blackman window function. Sequential windows were shifted by 50 data points (2.5 ms). The resulting spectrograms were interpolated in the frequency dimension for visual purposes using a resolution of 2 Hz and were then thresholded to remove low power background.

**328 Fish identification and tracking** Our EOD tracking system is optimized for identifying and tracking individual wave-type electric fish, to estimate the fish's positions, and to detect communication signals. The signals of pulse-type electric fish were detected, but remain unprocessed for now. First, information about electric fish presence, EOD frequency (EOD $f$ ), and approximate position were extracted. Each electrode signal was analyzed separately in sequential overlapping windows (1.22 s width, 85 % overlap). For each window the power spectral density was calculated (8192 FFT data points, 5 sub-windows, 50% overlap) and spectral peaks above a given threshold were detected. Individual fish were extracted from the list of peak frequencies, based on the harmonic structure of wave-type EODs. For each analysis window, EOD detections from all electrodes were matched and consolidated. Finally, fish detections in successive time windows were matched, combined, and stored for further analysis.

337 **Position estimation** Once the presence of an electric fish was established, the fish's position was estimated  
338 and chirps were detected. For each fish, the signals of all electrodes were bandpass-filtered (forward-backward  
339 butterworth filter, 3rd order,  $5\times$  multipass,  $\pm 7$  Hz width) at the fish's EOD $f$ . Then the envelope was computed  
340 from the resulting filtered signal using a root-mean-square filter (10 EOD cycles width). Each 40 ms the fish  
341 position  $\vec{x}$  was estimated from the four electrodes  $i$  with the largest envelope amplitudes  $A_i$  at position  $\vec{e}_i$  as a  
342 weighted spatial average

$$\vec{x} = \frac{\sum_{i=1}^{n=4} \sqrt{A_i} \cdot \vec{e}_i}{\sum_{i=1}^{n=4} \sqrt{A_i}}$$

343 (movie [S 4](#)). If fewer than two electrodes with EOD amplitudes larger than  $15 \mu\text{V}$  were available, the position  
344 estimate was omitted. Although this estimate does not relate to the underlying physics of the electric field, it proved  
345 to be the most robust against interference by electrical noise ([Hopkins, 1973](#)) and fish moving close to the edges  
346 of the electrode array, as verified with both experiments and simulations. For the electrode configuration used, the  
347 weighted spatial average yielded a precision of  $4.2 \pm 2.6$  cm on level with the electrode array and  $6.2 \pm 3.8$  cm at a  
348 vertical distance of 15 cm as computed by extensive simulations. Finally, the position estimates were filtered with  
349 a running average filter of 200 ms width to yield a smoother trace of movements. For pulse-type electric fish an  
350 EOD-based method for tracking electric fish position in shallow water in a laboratory setup has been published  
351 recently, yielding slightly better precision with a physically more realistic lookup-table-based approach ([Jun et al.,](#)  
352 [2013](#)).

353 **Chirp detection and analysis** For each fish the electrode voltage traces were bandpass-filtered (forward-backward  
354 butterworth filter, 3rd order,  $5\times$  multipass,  $\pm 7$  Hz width) at the fish's EOD $f$  and at 10 Hz above the EOD $f$ . For  
355 each passband the signal envelope was estimated using a root-mean-square filter over 10 EOD cycles. Rapid  
356 positive EOD frequency excursions cause the signal envelope at the fish's baseline frequency to drop and in the  
357 passband above the fish's EOD $f$  to increase in synchrony with the frequency excursion. If events were detected  
358 synchronously in both passbands on more than two electrodes, and exceeded a preset amplitude threshold, they  
359 were accepted as communication signals.

360 Communication signals with a single peak in the upper passband were detected as small chirps. Signals of up  
361 to 600 ms duration and two peaks in the upper passband, marking the beginning and the end of the longer frequency  
362 modulation, were detected as long chirps. All chirps in this study were verified manually. However, it is likely that  
363 some chirps were missed, since detection thresholds were set such that the number of false positives was very low.

364 Interchirp-interval probability densities were generated for pairs of fish and only for the time period in which  
365 both fish were producing chirps. Kernel density histograms of interchirp intervals ([Fig. S 2](#)) were computed with a

366 Gaussian kernel with a standard deviation of 20 ms.

367 Rates of small chirps before and after female long chirps (Fig. 5 A, C) were calculated by convolving the chirp  
368 times with a Gaussian kernel ( $\sigma = 0.5$  s) separately for each episode and subsequently calculating the means and  
369 standard deviations.

370 For quantifying the echo response (Fig. 6) we computed the cross-correlogram

$$r(\tau) = \frac{1}{n_a} \sum_{j=1}^{n_a} \sum_{i=1}^{n_b} g(\tau - (t_{b,i} - t_{a,j}))$$

371 with the  $n_a$  chirp times  $t_{a,j}$  of fish  $a$  and the  $n_b$  chirp times  $t_{b,i}$  of fish  $b$  using a Gaussian kernel  $g(t)$  with a  
372 standard deviation of 20 ms. To estimate its confidence intervals, we repeatedly resampled the original dataset  
373 (2000 times jackknife bootstrapping; random sampling with replacement), calculated the cross-correlogram as  
374 described above and determined the 2.5 and 97.5 % percentiles. To create the cross-correlograms of independent  
375 chirps, we repeatedly (2000 times) calculated the cross-correlograms on chirps jittered in time by adding a random  
376 number drawn from a Gaussian distribution with a standard deviation of 500 ms and determined the mean and  
377 the 2.5 and 97.5 % percentiles. Deviations of the observed cross-correlogram beyond the confidence interval of  
378 the cross-correlogram of jittered chirp times are significant on a 5 % level, and are indicative of an echo response.  
379 Reasonable numbers of chirps for computing meaningful cross-correlograms (more than several hundreds of chirps)  
380 were available in five pairs of fish.

381 **Beat frequencies and spatial distances** The distance between two fish at the time of each chirp (Fig. 8 C) was  
382 determined from the estimated fish positions. Because position estimates were not always available for each time  
383 point we allowed for a tolerance of maximally two seconds around the chirp for retrieving the position estimate.  
384 The positions were compiled into kernel density histograms that were normalized to their maximal value. The  
385 Gaussian kernel had a standard deviation of 1 cm for courtship small chirps, and 2 cm for courtship long chirps  
386 as well as intruder small chirps. Males ( $n = 8$ ) intruding on a courting dyad initially lingered at some distance  
387 from the dyad before either approaching the dyad further or being chased away by the courting resident male.  
388 Distances between the intruding male and the courting male during this assessment behavior (Fig. 8 D, top) were  
389 measured every 40 ms beginning with the appearance of the intruding fish until the eventual approach or attack.  
390 These distances, collected from a total assessment time of 923 s, were summarized in a kernel density histogram  
391 with Gaussian kernels with a standard deviation of 2 cm.

392 When a male intruded on a courting dyad it was directly attacked by the resident male. In that process courtship  
393 was always interrupted and eventually one of the males withdrew. In some cases a few chirps were emitted by the

394 retreating male. The winning male always approached and courted the female. The attack distances between two  
395 males (Fig. 8 D, bottom) were determined at the moment a resident male initiated its movement toward an intruding  
396 male. This moment was clearly identifiable as the onset of a linear movement of the resident male towards the  
397 intruder from plots showing the position of the fish as a function of time.

398 The distribution of beat frequencies generated by fish present in the electrode array at the same time (Fig. 8 F)  
399 was calculated from all available recordings during the breeding season. The average frequency difference of each  
400 pair of fish simultaneously detected in the recordings was compiled into a kernel density histogram with a Gaussian  
401 kernel with a standard deviation of 10 Hz. Similarly, for courtship and aggressive behavior (Fig. 8 G, H) the mean  
402 frequency differences were extracted for the duration of these interactions.

403 **Electric fields** For an estimation of EOD amplitude as a function of distance, histograms of envelope amplitudes  
404 from all electrodes of the array were computed as a function of distance between the electrodes and the estimated  
405 fish position. For each distance bin in the range of 20 – 100 cm the upper 95 % percentile of the histogram was  
406 determined and a power law was fitted to these data points. Gymnotiform electroreceptors measure the electric  
407 field, i.e., the first spatial derivative of the EOD amplitudes as shown in Fig. 8 A.

#### 408 **Breeding monitoring setup**

409 In the laboratory breeding study, we used the brown ghost knifefish *Apteronotus leptorhynchus*, a close relative of *A.*  
410 *rostratus* (de Santana and Vari, 2013). *Apteronotus leptorhynchus* is an established model organism in neuroscience  
411 and readily available from aquarium suppliers. The two species share many similarities. (i) Most chirps produced  
412 by both species are “small chirps” that in *A. leptorhynchus* have been classified as type-2 chirps (Engler and Zupanc,  
413 2001). (ii) Females of both species additionally generate small proportions of “long chirps”, similar to the type-4  
414 chirps classified for *A. leptorhynchus* males. (iii) Both species show the same sexual dimorphism in EOD*f*.

415 The laboratory setup for breeding *A. leptorhynchus* consisted of a holding tank (100 × 45 × 60 cm) placed in  
416 a darkened room and equipped with bubble filters and PVC tubes provided for shelter. Heating was supplied via  
417 room temperature, which kept water temperature between 21 and 30 °C. The light/dark cycle was set to 12/12  
418 hours. Several pieces of rock were placed in the center of the tank as spawning substrate. EOD signals were  
419 recorded differentially using four pairs of graphite electrodes. Two electrode pairs were placed on each side of  
420 the spawning substrate. The signals were amplified and analog filtered using a custom-built amplifier (100× gain,  
421 100 Hz high-pass, 10 kHz low-pass; npi electronics GmbH, Tamm, Germany), digitized at 20 kHz with 16 bit (PCI-  
422 6229, National Instruments, Austin, Texas, USA), and saved to hard disk for offline analysis. The electrode pairs

423 were positioned orthogonally to each other, thereby allowing for robust recordings of EODs independent of fish  
424 orientation. The tank was illuminated at night with a dozen infrared LED spotlights (850 nm, 6W, ABUS TV6700)  
425 and monitored continuously (movie [S 7](#)) with two infrared-sensitive high-resolution video cameras (Logitech HD  
426 webcam C310, IR filter removed manually). The cameras were controlled with custom written software (<https://github.com/bendalab/videoRecorder>) and a timestamp for each frame was saved for later synchronization  
427 of the cameras and EOD recordings. Six fish of *A. leptorhynchus* (three male, three female; imported from the Ro  
428 Meta region, Colombia) were kept in a tank for over a year before being transferred to the recording tank. First, fish  
429 were monitored for about a month without external interference. We then induced breeding conditions ([Kirschbaum  
430 and Schugardt, 2002](#)) by slowly lowering water conductivity from 830  $\mu\text{S}/\text{cm}$  to about 100  $\mu\text{S}/\text{cm}$  over the course  
431 of three months by diluting continuously the tank water with deionized water. The tank was monitored regularly  
432 for the occurrence of spawned eggs.  
433

#### 434 **Electrophysiology**

435 For *in vivo* recordings fish were anesthetized with MS-222 (120 mg/l; PharmaQ, Fordingbridge, UK; buffered to  
436 pH 7 with sodium bicarbonate) and a small part of the skin was removed to expose the anterior part of the lateral  
437 line nerve that contains only electroreceptor afferent fibers innervating electroreceptors on the fish's trunk ([Maler  
438 et al., 1974](#)). The margin of the wound was treated with the local anesthetic Lidocaine (2%; bela-pharm, Vechta,  
439 Germany). Then the fish was immobilized by intramuscular injection of Tubocurarine (Sigma-Aldrich, Steinheim,  
440 Germany; 25 – 50  $\mu\text{l}$  of 5 mg/ml solution), placed in a tank, and respired by a constant flow of water through its  
441 mouth. The water in the experimental tank ( $47 \times 42 \times 12$  cm) was from the fish's home tank with a conductivity  
442 of about 300  $\mu\text{S}/\text{cm}$  and kept at 28 °C. All experimental protocols were approved by the local district animal care  
443 committee and complied with federal and state laws of Germany (file no. ZP 1/13) and Canada.

444 Population activity in whole-nerve recordings was measured using a pair of hook electrodes of chlorided silver  
445 wire. Signals were differentially amplified (gain 10 000) and band-pass filtered (3 to 3 000 Hz passband, DPA2-FX;  
446 npi electronics), digitized (20 kHz sampling rate, 16-bit, NI PCI-6229; National Instruments), and recorded with  
447 RELACS ([www.relacs.net](http://www.relacs.net)) using efield and efish plugins. The strong EOD artifact in this kind of recording  
448 was eliminated before further analysis by applying a running average of the size of one EOD period ([Benda et al.,  
449 2006](#)). The resulting signal roughly followed the amplitude modulation of the EOD and we quantified its amplitude  
450 by taking its standard deviation. The nerve recordings closely resemble the properties of P-unit responses obtained  
451 from single and dual-unit recordings ([Benda et al., 2006](#); [Walz et al., 2014](#)). Note, however, that P-units might still  
452 respond in subtle ways to a stimulus even though the nerve recording is already down at baseline level, because

453 of additional noise sources in this kind of recording. Signal-to-noise ratios were simply computed as Cohen's  $d$   
454 between the responses and baseline activity.

455 Electric sine-wave stimuli with frequencies ranging from  $\Delta f = -460$  to  $+460$  Hz in steps of 2 Hz ( $|\Delta f| \leq$   
456 20 Hz), 10 Hz ( $|\Delta f| \leq 200$  Hz), and 20 Hz ( $|\Delta f| > 200$  Hz) relative to the fish's EOD  $f$  were applied through a pair  
457 of stimulation electrodes (carbon rods, 30 cm long, 8 mm diameter) placed on either side of the fish. Stimuli were  
458 computer-generated and passed to the stimulation electrodes after being attenuated to the right amplitude (0.05, 0.1,  
459 0.2, 0.5, 1.0, 2.5, 5.0, 10.0, 20.0, 40.0 % of the fish's EOD amplitude estimated with a pair of electrodes separated  
460 by 1 cm perpendicular to the side of the fish) and isolated from ground (Attenuator: ATN-01M; Isolator: ISO-02V;  
461 npi electronics). For more details see [Benda et al. \(2006\)](#); [Walz et al. \(2014\)](#).

## 462 **Acknowledgment**

463 Supported by the BMBF Bernstein Award Computational Neuroscience 01GQ0802 to J.B., a Discovery Grant  
464 from the Natural Sciences and Engineering Research Council of Canada to RK, and a Short Time Fellowship to  
465 J.H. from the Smithsonian Tropical Research Institute. We thank Hans Reiner Polder and Jrgen Planck from npi  
466 electronic GmbH for designing the amplifier, Sophie Picq, Diana Sharpe, Luis de Len Reyna, Rigoberto Gonzlez,  
467 Eldredge Bermingham, the staff from the Smithsonian Tropical Research Institute, and the Ember community of  
468 Pea Bijagual for their logistical support, Fabian Sinz for advice on the analysis, and Ulrich Schnitzler and Janez  
469 Presern for comments on the manuscript.

## 470 **Competing interests**

471 Authors declare no conflicts of interest.

## 472 **References**

- 473 Arnott G, Elwood RW (2008) Information gathering and decision making about resource value in animal contests.  
474 *Anim Behav* 76:529–542.
- 475 Bastian J (1981a) Electrolocation I. How electroreceptors of *Apteronotus albifrons* code for moving objects and  
476 other electrical stimuli. *J Comp Physiol* 144:465–479.
- 477 Bastian J (1981b) Electrolocation II. The effects of moving objects and other electrical stimuli on the activities of  
478 two categories of posterior lateral line lobe cells in *Apteronotus albifrons*. *J Comp Physiol* 144:481–494.

- 479 Bastian J (1986) Gain control in the electrosensory system mediated by descending inputs to the electrosensory  
480 lateral line lobe. *J Neurosci* 6:553–562.
- 481 Benda J, Longtin A, Maler L (2005) Spike-frequency adaptation separates transient communication signals from  
482 background oscillations. *J Neurosci* 25:2312–2321.
- 483 Benda J, Longtin A, Maler L (2006) A synchronization-desynchronization code for natural communication signals.  
484 *Neuron* 52:347–358.
- 485 Betsch BY, Einhäuser W, Körding KP, König P (2004) The world from a cat’s perspective — statistics of natural  
486 videos. *Biol Cybern* 90:41–50.
- 487 Bradbury JW, Vehrencamp SL (2011) *Principles of animal communication*. Sunderland: Sinauer, 2nd edition.
- 488 Bullock TH, Hamstra RH, Scheich H (1972) The jamming avoidance response of high frequency electric fish. II.  
489 Quantitative aspects. *J Comp Physiol* 77:23–48.
- 490 Carr CE, Maler L, Sas E (1982) Peripheral organization and central projections of the electrosensory nerves in  
491 gymnotiform fish. *J Comp Neurol* 211:139–153.
- 492 Chacron MJ (2006) Nonlinear information processing in a model sensory system. *J Neurophysiol* 95:2933–2946.
- 493 Chacron MJ, Doiron B, Maler L, Longtin A, Bastian J (2003) Non-classical receptive field mediates switch in a  
494 sensory neuron’s frequency tuning. *Nature* 423:77–81.
- 495 Clemens J, Ronacher B (2013) Feature extraction and integration underlying perceptual decision making during  
496 courtship behavior. *J Neurosci* 33:12136–12145.
- 497 Deemyad T, Metzen MG, Pan Y, Chacron MJ (2013) Serotonin selectively enhances perception and sensory neural  
498 response to stimuli generated by same sex conspecifics. *PNAS* 110:19609–19614.
- 499 Dunlap KD, Thomas P, Zakon HH (1998) Diversity of sexual dimorphism in electrocommunication signals and its  
500 androgen regulation in a genus of electric fish, *Apteronotus*. *J Comp Physiol A* 183:77–86.
- 501 Ellis LD, Krahe R, Bourque CW, Dunn RJ, Chacron MJ (2007) Muscarinic receptors control frequency tuning  
502 through the downregulation of an A-type potassium current. *J Neurophysiol* 98:1526–1537.
- 503 Engler G, Zupanc GK (2001) Differential production of chirping behavior evoked by electrical stimulation of the  
504 weakly electric fish, *Apteronotus leptorhynchus*. *J Comp Physiol A* 187:747–756.
- 505 Fotowat H, , Harvey-Girard E, Cheer JF, Krahe R, Maler L (2016) Subsecond sensory modulation of serotonin  
506 levels in a primary sensory area and its relation to ongoing communication behavior in a weakly electric fish.  
507 *eNeuro* 3:e0115–16.2016 1–12.
- 508 Fotowat H, Harrison RR, Krahe R (2013) Statistics of the electrosensory input in the freely swimming weakly  
509 electric fish *Apteronotus leptorhynchus*. *J Neurosci* 33:13758–13772.

- 510 Fugère V, Ortega H, Krahe R (2011) Electrical signalling of dominance in a wild population of electric fish. *Biol*  
511 *Lett* 7:197–200.
- 512 Gao P, Ganguli S (2015) On simplicity and complexity in the brave new world of large-scale neuroscience. *Curr*  
513 *Opin Neurobiol* 334:666–670.
- 514 Giassi ACC, Duarte TT, Ellis W, Maler L (2012) Organization of the gymnotiform fish pallium in relation to  
515 learning and memory: II. extrinsic connections. *J Comp Neurol* 520:3338–3368.
- 516 Gollisch T, Meister M (2010) Eye smarter than scientists believed: neural computations in circuits of the retina.  
517 *Neuron* 65:150–164.
- 518 Grewe J, Kruscha A, Lindner B, Benda J (2017) Synchronous spikes are necessary but not sufficient for a synchrony  
519 code in populations of spiking neurons. *PNAS* 114:E1977–E1985.
- 520 Gussin D, Benda J, Maler L (2007) Limits of linear rate coding of dynamic stimuli by electroreceptor afferents. *J*  
521 *Neurophysiol* 97:2917–2929.
- 522 Hagedorn M (1988) Ecology and behavior of a pulse-type electric fish *Hypopomus occidentalis* in a fresh-water  
523 stream in Panama. *Copeia* 2:324–335.
- 524 Hagedorn M, Heiligenberg W (1985) Court and spark: electric signals in the courtship and mating of gymnotid  
525 fish. *Anim Behav* 33:254–265.
- 526 Heiligenberg W (1991) Neural nets in electric fish. Cambridge, MA: MIT Press.
- 527 Heiligenberg W, Dye J (1982) Labelling of electroreceptive afferents in a gymnotoid fish by intraeellular injection  
528 of HRP: the mystery of multiple maps. *J Comp Physiol* 148:287–296.
- 529 Hopkins CD (1973) Lightning as background noise for communication among electric fish. *Nature* 242:268–270.
- 530 Hupé GJ, Lewis JE (2008) Electrocommunication signals in free swimming brown ghost knifefish, *Apteronotus*  
531 *leptorhynchus*. *J Exp Biol* 211:1657–1667.
- 532 Jun JJ, Longtin A, Maler L (2013) Real-time localization of moving dipole sources for tracking multiple free-  
533 swimming weakly electric fish. *PLoS ONE* 8.
- 534 Jung SN, Longtin A, Maler L (2016) Weak signal amplification and detection by higher-order sensory neurons. *J*  
535 *Neurophysiol* 115:2158–2175.
- 536 Kirschbaum F, Schugardt C (2002) Reproductive strategies and developmental aspects in mormyrid and gymnoti-  
537 form fishes. *J Physiol Paris* 96:557–566.
- 538 Knight BW (1972) Dynamics of encoding in a population of neurons. *J Gen Physiol* 59:734–766.
- 539 Knudsen EI (1974) Behavioral thresholds to electric signals in high frequency electric fish. *J Comp Physiol A*  
540 91:333–353.



- 541 Kostarakos K, Hennig MR, Römer H (2009) Two matched filters and the evolution of mating signals in four species  
542 of cricket. *Front Zool* 6:22.
- 543 Krahe R, Bastian J, Chacron MJ (2008) Temporal processing across multiple topographic maps in the electrosen-  
544 sory system. *J Neurophysiol* 100:852–867.
- 545 Krahe R, Maler L (2014) Neural maps in the electrosensory system of weakly electric fish. *Curr Opin Neurobiol*  
546 24:13–21.
- 547 Ladich F (2007) Females whisper briefly during sex: context- and sex-specific differences in sounds made by  
548 croaking gouramis. *Anim Behav* 73:379–387.
- 549 Laughlin S (1981) A simple coding procedure enhances a neuron’s information capacity. *Z Naturforsch C* 36:910–  
550 912.
- 551 Lewicki MS, Olshausen BA, Surlykke A, Moss CF (2014) Scene analysis in the natural environment. *Front Psychol*  
552 5:1–21.
- 553 Lobel PS (1992) Sounds produced by spawning fishes. *Environ Biol Fishes* 33:351–358.
- 554 Machens CK, Gollisch T, Kolesnikova O, Herz AVM (2005) Testing the efficiency of sensory coding with optimal  
555 stimulus ensembles. *Neuron* 47:447–456.
- 556 Maler L (2009a) Receptive field organization across multiple electrosensory maps. I. Columnar organization and  
557 estimation of receptive field size. *J Comp Neurol* 516:376–393.
- 558 Maler L (2009b) Receptive field organization across multiple electrosensory maps. II. Computational analysis of  
559 the effects of receptive field size on prey localization. *J Comp Neurol* 516:394–422.
- 560 Maler L, Finger T, Karten HJ (1974) Differential projections of ordinary lateral line receptors and electroreceptors  
561 in the gymnotid fish, *Apteronotus (Sternarchus) albifrons*. *J Comp Neurol* 158:363–382.
- 562 Maler L, Sas EKB, Rogers J (1981) The cytology of the posterior lateral line lobe of high-frequency weakly  
563 electric fish (Gymnotidae): Dendritic differentiation and synaptic specificity in a simple cortex. *J Comp Neurol*  
564 195:87–139.
- 565 Markham MR, Ban Y, McCauley A, Maltby R (2016) Energetics of sensing and communication in electric fish: A  
566 blessing and a curse in the Anthropocene? *Integr Comp Biol* 56:889–900.
- 567 Marsat G, Longtin A, Maler L (2012) Cellular and circuit properties supporting different sensory coding strategies  
568 in electric fish and other systems. *Curr Opin Neurobiol* 22:1–7.
- 569 Metzner W, Heiligenberg W (1991) The coding of signals in the electric communication of the gymnotiform fish  
570 *Eigenmannia*: From electroreceptors to neurons in the torus semicircularis of the midbrain. *J Comp Physiol A*  
571 169:135–150.

- 572 Metzner W, Juranek J (1997) A sensory brain map for each behavior? PNAS 94:14798–14803.
- 573 Meyer JH, Leong M, Keller CH (1987) Hormone-induced and maturational changes in electric organ discharges  
574 and electroreceptor tuning in the weakly electric fish *Apteronotus*. J Comp Physiol A 160:385–394.
- 575 Meyer JH, Zakon HH (1982) Androgens alter the tuning of electroreceptors. Science 217:635–637.
- 576 Middleton JW, Longtin A, Benda J, Maler L (2009) Postsynaptic receptive field size and spike threshold determine  
577 encoding of high-frequency information via sensitivity to synchronous presynaptic activity. J Neurophysiol  
578 101:1160–1170.
- 579 Nelson ME, MacIver MA (1999) Prey capture in the weakly electric fish *Apteronotus albifrons*: sensory acquisition  
580 strategies and electrosensory consequences. J Exp Biol 202:1195–1203.
- 581 Nelson ME, Xu Z, Payne JR (1997) Characterization and modeling of P-type electrosensory afferent responses to  
582 amplitude modulations in a wave-type electric fish. J Comp Physiol A 181:532–544.
- 583 Olshausen BA, Field DJ (1996) Emergence of simple-cell receptive-field properties by learning a sparse code for  
584 natural images. Nature 381:607–609.
- 585 Olshausen BA, Field DJ (2005) How close are we to understanding V1?. Neural Comput 17:1665–1699.
- 586 Rieke F, Bodnar DA, Bialek W (1995) Naturalistic stimuli increase the rate and efficiency of information transmis-  
587 sion by primary auditory afferents. Proc R Soc Lond B 262:259–265.
- 588 Rodriguez-Munoz R, Bretman A, Slate J, Walling CA, Tregenza T (2010) Natural and sexual selection in a wild  
589 insect population. Science 328:1269–1272.
- 590 Rose G, Heiligenberg W (1985) Temporal hyperacuity in the electric sense of fish. Nature 318:178–180.
- 591 Salazar VL, Krahe R, Lewis JE (2013) The energetics of electric organ discharge generation in gymnotiform weakly  
592 electric fish. J Exp Biol 216:2459–2468.
- 593 Salgado JAG, Zupanc GKH (2011) Echo response to chirping in the weakly electric brown ghost knifefish  
594 (*Apteronotus leptorhynchus*): role of frequency and amplitude modulations. Can J Zool 89:498–508.
- 595 de Santana CD, Vari RP (2013) Brown ghost electric fishes of the *Apteronotus leptorhynchus* species-group (Os-  
596 tariophysi, Gymnotiformes); monophyly, major clades, and revision. Zool J Linnean Soc 168:564–596.
- 597 Savard M, Krahe R, Chacron MJ (2011) Neural heterogeneities influence envelope and temporal coding at the  
598 sensory periphery. Neurosci 172:270–284.
- 599 Scheich H, Bullock TH, Robert H Hamstra J (1973) Coding properties of two classes of afferent nerve fibers: high  
600 frequency electroreceptors in the electric fish, *Eigenmannia*. J Neurophysiol 36:39–60.
- 601 Schrode KM, Bee MA (2015) Evolutionary adaptations for the temporal processing of natural sounds by the anuran  
602 peripheral auditory system. J Exp Biol 218:837–848.

- 603 Silva A, Quintana L, Perrone R, Sierra F (2008) Sexual and seasonal plasticity in the emission of social electric  
604 signals. Behavioral approach and neural bases. *J Physiol Paris* 102:272–278.
- 605 Smith EC, Lewicki MS (2006) Efficient auditory coding. *Nature* 439:978–982.
- 606 Smith GT (2013) Evolution and hormonal regulation of sex differences in the electrocommunication behavior of  
607 ghost knifefishes (Apteronotidae). *J Exp Biol* 216:2421–33.
- 608 Stamper SA, Carrera-G E, Tan EW, Fugère V, Krahe R, Fortune ES (2010) Species differences in group size and  
609 electrosensory interference in weakly electric fishes: implications for electrosensory processing. *Behav Brain*  
610 *Res* 207:368–376.
- 611 Stöckl A, Sinz F, Benda J, Grewe J (2014) Encoding of social signals in all three electrosensory pathways of  
612 *Eigenmannia virescens*. *J Neurophysiol* 112:2076–2091.
- 613 Theunissen FE, Sen K, Doupe AJ (2000) Spectral-temporal receptive fields of nonlinear auditory neurons obtained  
614 using natural sounds. *The Journal of Neuroscience* 20:2315–2331.
- 615 Triefenbach FA, Zakon H (2008) Changes in signalling during agonistic interactions between male weakly electric  
616 knifefish, *Apteronotus leptorhynchus*. *Anim Behav* 75:1263–1272.
- 617 Vonderschen K, Chacron MJ (2011) Sparse and dense coding of natural stimuli by distinct midbrain neuron sub-  
618 populations in weakly electric fish. *J Neurophysiol* 106:3102–3118.
- 619 Walz H, Grewe J, Benda J (2014) Static frequency tuning properties account for changes in neural synchrony  
620 evoked by transient communication signals. *J Neurophysiol* 112:752–765.
- 621 Walz H, Hupé G, Benda J, Lewis JE (2013) The neuroethology of electrocommunication: how signal background  
622 influences sensory encoding and behaviour in *Apteronotus leptorhynchus*. *J Physiol Paris* 107:13–25.
- 623 Wilson EO (1975) *Sociobiology: the new synthesis*. Cambridge MA: Harvard University Press.
- 624 Zakon HH, Oestreich J, Tallarovic S, Triefenbach F (2002) EOD modulations of brown ghost electric fish: JARs,  
625 chirps, rises, and dips. *J Physiol Paris* 96:451–458.
- 626 Zupanc GKH, Sîrbulescu RF, Nichols A, Ilies I (2006) Electric interactions through chirping behavior in the weakly  
627 electric fish, *Apteronotus leptorhynchus*. *J Comp Physiol A* 192:159–173.

628 **Supporting information**

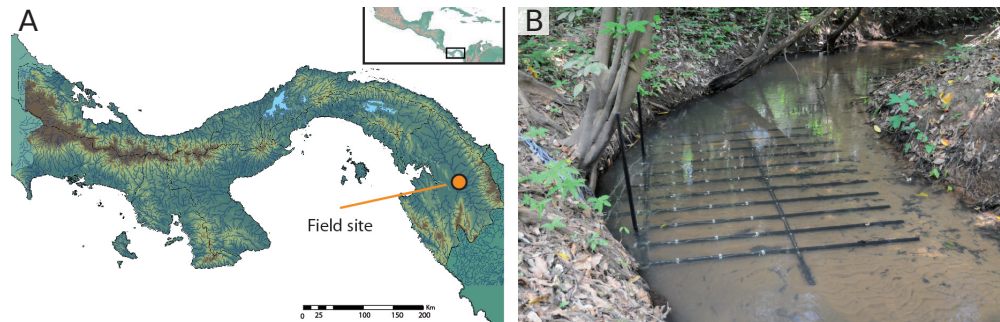

Figure S1: Field site and position of electrode array. A) The field data were recorded in the Darin province in Eastern Panam. B) The electrode array covered  $2.4 \times 1.5 \text{ m}^2$  of our recording site in a small quebrada of the Chucunaque River system. Electrodes (on white electrode holders) were positioned partly beneath the excavated banks, allowing to record electric fish hiding deep in the root masses.

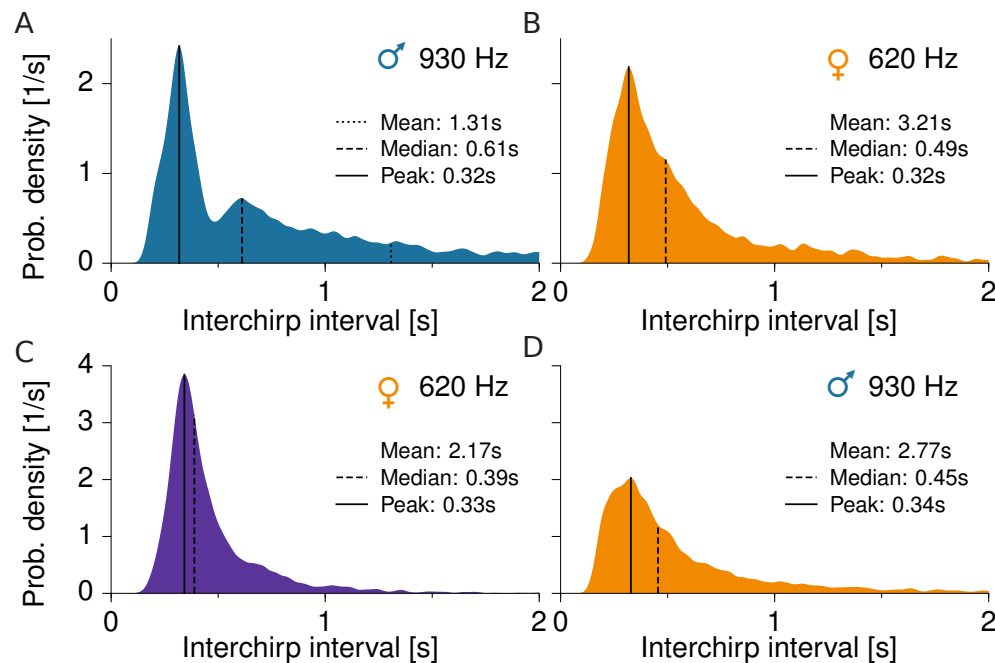

Figure S2: Interchirp-interval distributions of small chirps of an example female (right column,  $EODf = 620 \text{ Hz}$ ; B:  $n = 3431$ , D:  $n = 5336$  chirps) interacting with two males (left column; A:  $EODf = 930 \text{ Hz}$ ,  $n = 8439$ ; C:  $EODf = 1035 \text{ Hz}$ ,  $n = 6857$  chirps).

629 **Audio, Animations, and Video**

**Audio S 3:** Audio trace of the courtship sequence shown in Fig. 3. A male ( $EODf = 930\text{ Hz}$ ) generated a series of small chirps. Eventually, the female ( $EODf = 620\text{ Hz}$ ) fish joins in, increases chirp rate and finishes with a long chirp, which is acknowledged by the male with a small chirp doublet.

File: audio\_courtship.wav

**Movie S 4:** Example of raw voltage recordings and corresponding position estimates of a single fish, *Eigenmannia humboldtii*, passing through the array of electrodes. The head and tail area of its electric field are of opposite polarity, which is why the polarity of the recorded EOD switches as the fish passes an electrode. Note the large electric spikes occurring irregularly on all electrodes. Previous studies (Hopkins, 1973) attributed similar patterns to propagating distant lightning. The animation is played back at real-time.

File: movie\_raw\_and\_position.avi

**Movie S 5:** Animation of the courtship and aggression behavior shown in Fig. 2. A courting dyad is engaged in intense chirp activity (transparent circles and 50 ms beeps at the fish's baseline  $EODf$ ). An intruder male (red circles indicate positions of the last 5 seconds, black circles mark current positions) first lingers at a distance of one meter. When it approaches further, courting is interrupted and the resident male engages the intruder. Just before the male intruder retreats, it emits a series of small chirps, and subsequently leaves the recording area. The resident male returns to the female and resumes chirping. Eventually, the female responds with small chirps followed by a single long chirp (large open circle and a 500 ms beep at the female's baseline  $EODf$ ). Then both fish cease chirp activity and the male resumes to emit chirps after a few seconds. The animation is played back at  $2\times$  real-time.

File: movie\_intruder.avi

**Movie S 6:** Animation of a courtship sequence with multiple attempts of an intruding male to approach the courting dyad. The resident male drives the intruder away three times, starting the approach at increasingly greater distances. *Apteronotus rostratus* are marked by circles, *Eigenmannia humboldtii* by squares. The animation is played back at 2× real-time.

File: movie\_repetitive\_intruder.avi

**Movie S 7:** Spawning of the closely related species *Apteronotus leptorhynchus* during a breeding experiment. The overall sequence of chirp production is very similar to the courtship motif observed in *A. rostratus*. However, male *A. leptorhynchus* increasingly generate a second type of chirp, a variety of a long chirp, as spawning approaches. The video shows a big male (EOD $f$  = 770 Hz) courting a smaller female (590 Hz). The audio signal was created from concurrent EOD recordings. Both fish generate chirps at an increased rate (about 1.5 Hz), just before the male thrusts its snout against the female, which responds with a long chirp, clearly noticeable from the audio trace. Subsequently, the male retreats to a tube and the female hovers around the substrate, where the spawned egg was found.

File: movie\_spawning.avi
